# Supplementary material for: Study of the correlation between sensing performance and surface morphology of inkjet-printed aqueous graphene-based chemiresistors for NO2 detection
Source: publisher site journal article supplement (doi:10.3762/bjnano.8.103), 2017-05-09
Supplement: Additional file 1 [file 2190-4286-8-103-S1.pdf]

## **Supporting Information**

for

### **Study of the correlation between sensing performance and surface morphology of inkjet-printed aqueous graphene-based chemiresistors for NO<sub>2</sub> detection**

F. Villani<sup>1</sup>, C. Schiattarella<sup>2</sup>, T. Polichetti\*<sup>1</sup>, R. Di Capua<sup>2,3</sup>, F. Loffredo<sup>1</sup>, B. Alfano<sup>1</sup>,  
M. L. Miglietta<sup>1</sup>, E. Massera<sup>1</sup>, L. Verdoliva<sup>1</sup> and G. Di Francia<sup>1</sup>

Address: <sup>1</sup>ENEA - R.C. Portici, Piazzale E. Fermi 1, I-80055, Portici (Naples), Italy;  
<sup>2</sup>Dipartimento di Fisica "E. Pancini", Università di Napoli "Federico II", Via Cintia, I-80126,  
Naples, Italy and <sup>3</sup>CNR-SPIN UOS Napoli, Via Cintia, I-80126, Naples, Italy

Email: Tiziana Polichetti\* - tiziana.polichetti@enea.it

\* Corresponding author

### **Additional experimental data**

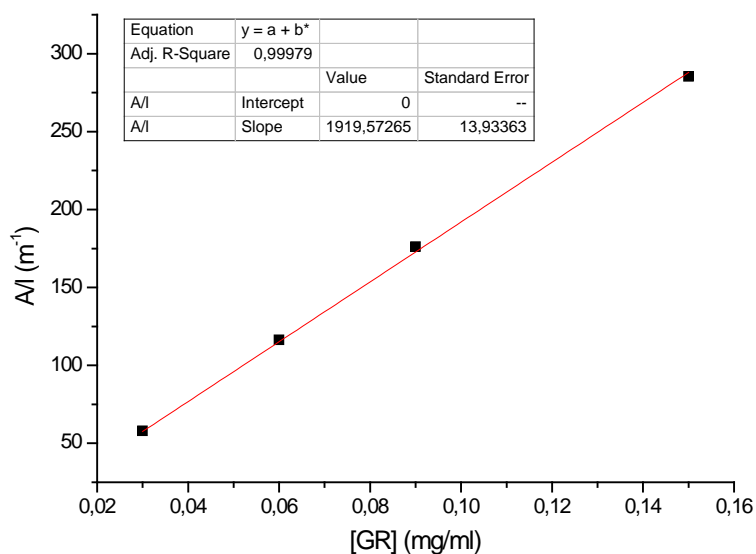

**Figure S1:** Absorbance per unit length ( $\lambda = 660 \text{ nm}$ ) as a function of the graphite concentration (after centrifugation).

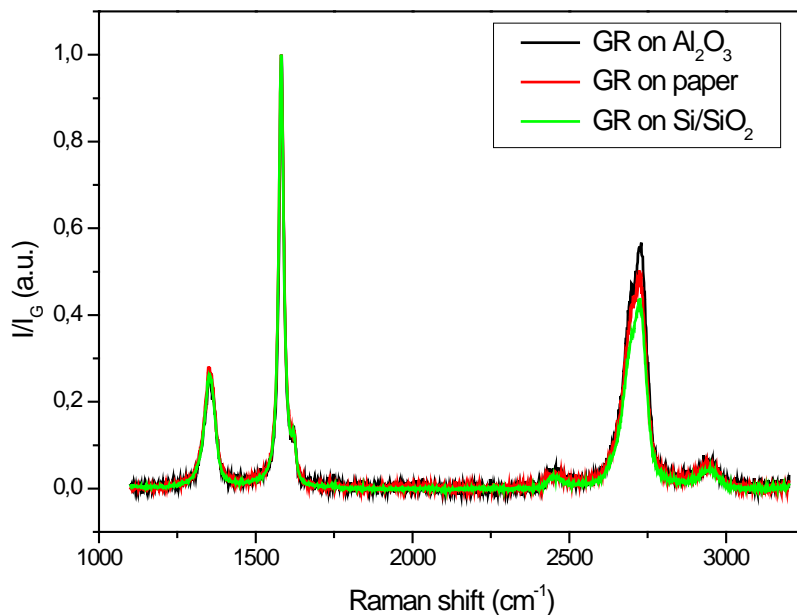

**Figure S2:** Raman analysis performed on the devices printed on different substrates.

Raman analysis performed on all the devices shows features perfectly overlapped, without any displacement of peaks positions. This is a clear indication of the absence of a doping

effect induced by the substrates. As can be observed, even the  $I(D)/I(G)$  ratio is the same for all the sensing films. This demonstrates that the defect density is retained regardless of the substrate.
